# Supplementary material
Source: PubMed Central journal article supplement (PMC4601049)
Supplement: jm5b00655_si_001.pdf [file jm5b00655_si_001.pdf]

## Enhancement of selectivity of an organometallic anticancer agent by redox modulation

I. Romero-Canelón, M. Mos and P. J. Sadler

In all cases, independent two-sample t-tests with unequal variances, Welch's tests, were carried out to establish statistical significance of the variations ( $p < 0.001$  for \*\*\*,  $p < 0.01$  for \*\*, and  $p < 0.05$  for \*).

**Table 1.** Selectivity factors.

|                  | IC <sub>50</sub> (nM ± SD) |                              | Selectivity factor<br>IC <sub>50</sub> -MRC5/IC <sub>50</sub> -A2780 |
|------------------|----------------------------|------------------------------|----------------------------------------------------------------------|
|                  | A2780 ovarian cancer cells | MRC5 foetal lung fibroblasts |                                                                      |
| FY26             | 160 ± 10                   | 4550 ± 60                    | 28.4 ***                                                             |
| FY26 + 5 μM LBSO | 69 ± 5                     | 4380 ± 25                    | 63.5 ***                                                             |

**Table 2.** GSH determination in A2780 cells – values normalised to the negative controls. All values compared to the untreated controls for statistical significance calculations.

|     | L-BSO (μM)  |             |                |                |
|-----|-------------|-------------|----------------|----------------|
|     | 0           | 1           | 5              | 50             |
| GSH | 1.00 ± 0.01 | 0.95 ± 0.02 | 0.56 ± 0.03*** | 0.37 ± 0.02*** |

|     | FY26 IC <sub>50</sub> |                | FY26 2xIC <sub>50</sub> |                |
|-----|-----------------------|----------------|-------------------------|----------------|
|     |                       | + L-BSO        |                         | + L-BSO        |
| GSH | 0.92 ± 0.01**         | 0.54 ± 0.03*** | 0.87 ± 0.02**           | 0.47 ± 0.03*** |

**Table 3.** Induction of ROS and superoxide determined by flow cytometry experiments in MRC5 fibroblasts. All values compared to the untreated controls for statistical significance calculations.

|                       | % populations  |             |             |                |
|-----------------------|----------------|-------------|-------------|----------------|
|                       | FL-1-/FL-2-    | FL-1+/FL-2- | FL-1-/FL-2+ | FL-1+/FL-2+    |
|                       | Lower left     | Lower right | Upper left  | Upper right    |
| FY26 IC <sub>50</sub> | 17.2 ± 0.9 *** | 59 ± 2 ***  | 5.6 ± 0.8 * | 18.3 ± 0.7 *** |
| Positive control      | 0.8 ± 0.3 ***  | 1.5 ± 0.6   | 2.1 ± 0.4   | 96 ± 2 ***     |
| Negative control      | 96 ± 3         | 1.2 ± 0.4   | 2.8 ± 0.7   | 0.1 ± 0.1      |

**Table 4.** Induction of ROS and superoxide in A2780 cells determined by flow cytometry experiments. All values compared to the untreated controls for statistical significance calculations.

|                                    | % populations |             |             |             |
|------------------------------------|---------------|-------------|-------------|-------------|
|                                    | FL-1-/FL-2-   | FL-1+/FL-2- | FL-1-/FL-2+ | FL-1+/FL-2+ |
|                                    | Lower left    | Lower right | Upper left  | Upper right |
| FY26 IC <sub>50</sub>              | 3.4 ± 0.8 *** | 0.5 ± 0.3   | 80 ± 3 ***  | 15 ± 2 ***  |
| FY26 IC <sub>50</sub> + 5 μM L-BSO | 3.5 ± 0.9 *** | 0.8 ± 0.3   | 76 ± 4 ***  | 19 ± 1 ***  |
| 5 μM L-BSO                         | 98 ± 2        | 0.2 ± 0.1   | 0.6 ± 0.2   | 0.7 ± 0.2   |
| Positive control                   | 1.2 ± 0.4 *** | 3.6 ± 0.9 * | 0.4 ± 0.2   | 96 ± 4 ***  |
| Negative control                   | 99 ± 2        | 0.3 ± 0.2   | 0.4 ± 0.3   | 0.4 ± 0.2   |

**Table 5.** Induction of apoptosis in A2780 cells using flow cytometry experiments. All values compared to the untreated controls for statistical significance calculations.

|                                    | % populations              |                                |                          |                               |
|------------------------------------|----------------------------|--------------------------------|--------------------------|-------------------------------|
|                                    | FL-1-/FL-2-                | FL-1+/FL-2-                    | FL-1-/FL-2+              | FL-1+/FL-2+                   |
|                                    | Lower left<br>Viable cells | Lower right<br>Early apoptosis | Upper left<br>Non-viable | Upper right<br>Late apoptosis |
| FY26 IC <sub>50</sub>              | 73 ± 3 ***                 | 1.2 ± 0.8                      | 16 ± 2 ***               | 8.6 ± 0.9 ***                 |
| FY26 IC <sub>50</sub> + 5 μM L-BSO | 75 ± 4 ***                 | 0.8 ± 0.2                      | 14 ± 3 ***               | 10 ± 1 ***                    |
| 5 μM L-BSO                         | 96 ± 3                     | 1.8 ± 0.8                      | 0.6 ± 0.2                | 0.2 ± 0.1                     |
| Positive control                   | 13 ± 2 ***                 | 4.5 ± 0.6                      | 76 ± 4 ***               | 6.2 ± 0.4 ***                 |
| Negative control                   | 97 ± 2                     | 2.4 ± 0.6                      | 0.8 ± 0.4                | 0.2 ± 0.1                     |

**Table 6.** Variations in mitochondrial membrane potential in A2780 cells determined by JC-1 dye using flow cytometry. All values are compared to the untreated controls for statistical significance calculations.

|                                    | % populations            |                           |
|------------------------------------|--------------------------|---------------------------|
|                                    | Low fluorescence<br>FL-2 | High fluorescence<br>FL-2 |
| FY26 IC <sub>50</sub>              | 9.8 ± 0.6 ***            | 90.1 ± 0.9 ***            |
| FY26 IC <sub>50</sub> + 5 μM L-BSO | 9.3 ± 0.3 ***            | 90.6 ± 0.8 ***            |
| 5 μM L-BSO                         | 10 ± 1 ***               | 92 ± 3 ***                |
| Positive control                   | 0.2 ± 0.1 ***            | 99.7 ± 0.1 ***            |
| Negative control                   | 96.9 ± 0.5               | 3.0 ± 0.5                 |

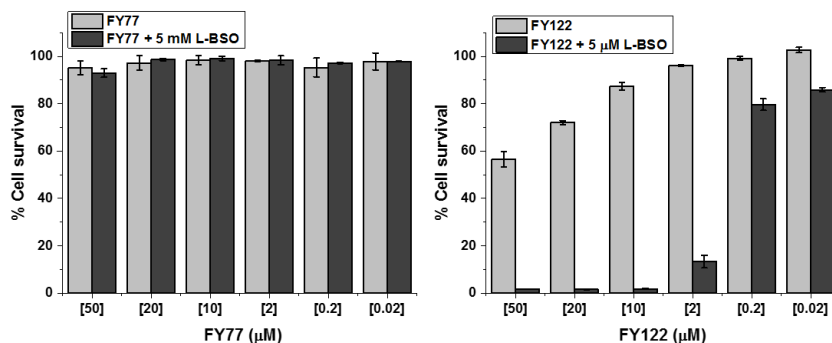

**Figure 1.** Percentages of survival of A2780 ovarian cancer cells exposed to various concentrations of structurally related osmium complexes FY77 ( $[\text{Os}(\eta^6\text{-bip})(\text{Cl-Azpy})\text{Cl}]\text{PF}_6$   $\text{IC}_{50}>100 \mu\text{M}$ ) and FY122 ( $[\text{Os}(\eta^6\text{-}p\text{-cym})(\text{OH-Impy})\text{I}]\text{PF}_6$   $\text{IC}_{50}= 30 \pm 2 \mu\text{M}$ ). The data are compared to A2780 cells exposed under similar conditions to the osmium complexes and co-administered with  $5 \mu\text{M}$  L-BSO. The drug exposure and recovery times were 24 h and 72 h, respectively.

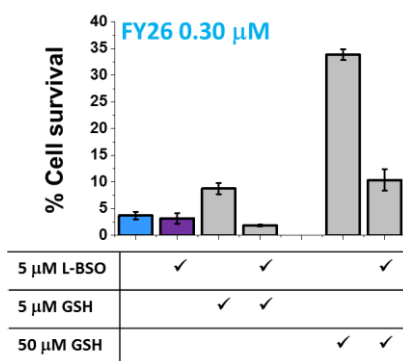

**Figure 2.** Effect of co-administration of  $0.30 \mu\text{M}$  FY26 with  $5 \mu\text{M}$  L-BSO in the presence/absence of GSH (5 and  $50 \mu\text{M}$ ) on the percentage of cell survival of A2780 ovarian cancer cells.

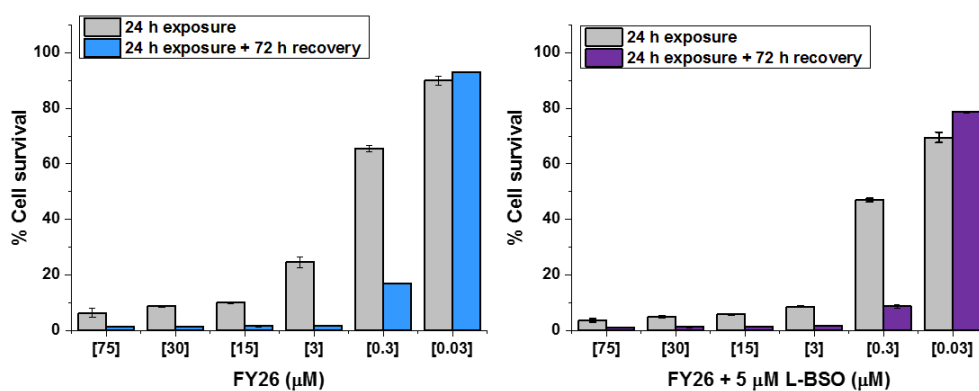

**Figure 3.** Percentages of survival of A2780 ovarian cancer cells exposed to different concentrations of FY26 +/-  $5 \mu\text{M}$  L-BSO. Results in color represent those experiments that included 72 h recovery time in drug-free medium, while results in grey did not. In both cases the drug exposure time was 24 h.
